# Supplementary material for: In situ modification of the d-band in the core–shell structure for efficient hydrogen storage via electrocatalytic N2 fixation
Source: Royal Society of Chemistry journal article supplement (doi:10.1039/d2sc03975c), 2022-01-01
Supplement: d2sc03975c1.pdf [file d2sc03975c1.pdf]

## Supporting Information

### **In situ modification of d-band in core-shell structure for efficient hydrogen storage via electrocatalytic N<sub>2</sub> fixation**

Xiaohui Yang<sup>a,b#</sup>, Jin Wan<sup>a#</sup>, Huijuan Zhang<sup>a</sup>, Yu Wang<sup>a,c\*</sup>

<sup>a</sup>School of Chemistry and Chemical Engineering, State Key Laboratory of Power Transmission Equipment & System Security and New Technology, Chongqing University, 174 Shazheng Street, Shapingba District, Chongqing City, 400044, P.R. China.

<sup>b</sup>Key Laboratory of Reservoir Aquatic Environment, Chongqing Institute of Green and Intelligent Technology, Chinese Academy of Sciences, No. 266, Fangzheng Avenue, Beibei District, Chongqing 400714, P.R. China.

<sup>c</sup>School of Electrical Engineering, Chongqing University, 174 Shazheng Street, Shapingba District, Chongqing City, 400044, P.R. China.

<sup>#</sup>These authors contributed equally to this work.

<sup>\*</sup>Corresponding author. E-mail: wangy@cqu.edu.cn (Yu Wang)

## Experimental Section

### Chemicals and materials

All chemicals were used without any purification in this work. Vanadium pentoxide ( $V_2O_5$ , AR), sodium sulfate ( $Na_2SO_4$ , AR), zinc nitrate hexahydrate ( $Zn(NO_3)_2 \cdot 6H_2O$ , AR), hexamethylenetetramine ( $C_6H_{12}N_4$ , AR), ammonium chloride ( $NH_4Cl$ , AR), hydrazine hydrate ( $N_2H_4 \cdot H_2O$ , AR), hydrochloric acid ( $HCl$ , AR), sulfuric acid ( $H_2SO_4$ ), trisodium citrate dihydrate ( $C_6H_5Na_3O_7 \cdot 2H_2O$ , AR), salicylic acid ( $C_7H_6O_3$ , AR), sodium hydroxide ( $NaOH$ , AR), sodium hypochlorite solution ( $NaClO$ ) and ethanol were purchased from Chengdu Kelong Chemical Ltd. P-dimethylaminobenzaldehyde ( $C_9H_{11}NO$ , AR) and sodium pentacyanonitrosylferrate dihydrate ( $Na_2Fe(CN)_5NO \cdot 2H_2O$ , AR) was supplied by Aladdin Reagents Ltd. The water used throughout all experiments was purified through a Millipore system.

### Synthesis of the precursor of $Zn_3(OH)_2(V_2O_7)(H_2O)_2$ nanosheets

A simple hydrothermal process was employed to synthesize the precursor based on the previous reports with appropriate modification. In a typical procedure, 1.5 mmol of  $V_2O_5$ , 3.5 mmol of  $Na_2SO_4$ , 1.0 mmol of  $Zn(NO_3)_2 \cdot 6H_2O$  and 2.5 mmol of  $C_6H_{12}N_4$  were, in turn, dissolved in 30 ml distilled water, and then stirred vigorously until it becomes clear. Subsequently, this clear mixed solution was transferred into a 50 ml Teflon-lined stainless-steel autoclave, and then hydrothermally treated at 120 °C for 24 h. Finally, the nanosheet precursor was obtained from solution by centrifugation, washed with deionized water/ethanol, and then collected and dried at 60°C in a vacuum.

### Synthesis of 2D porous $V_2O_3$ nanomeshs

The 2D porous  $V_2O_3$  nanomeshs were prepared by annealing the nanosheet precursor at 850°C for 300 min under a mixture of 40%/60% Ar/ $H_2$  flow.

### Synthesis of controlled 2D core/shell $V_2O_3/VN$ -X nanomeshs

The target samples of 2D core/shell  $V_2O_3/VN$ -X nanomeshs with gradient thickness of nitride shell were obtained via an accurate nitriding treatment, where the reaction conditions are under a mixture flow of Ar/ $NH_3$  of 80%/20% at 700 °C and the thickness of nitride shell is controlled by regulating the nitriding time. Based on this,  $V_2O_3/VN$ -0.5,  $V_2O_3/VN$ -2, and  $V_2O_3/VN$ -10 were prepared, in which 0.5, 2, and 10 represent the reaction time of 0.5 min, 2 min, and 10 min, respectively. Furthermore, the pure VN nanomeshs were also prepared by extending the nitriding time to 200 min.

### Characterization

The crystal structure of the as-synthesized samples was obtained by X-ray diffraction (XRD) on a Bruker D8 Advance diffractometer with Cu K $\alpha$  radiation ( $\lambda=0.154$  nm). The morphology and structure characterization were captured by field emission scanning electron microscopy (FESEM, JEOL JSM-7800F, 15kV), transmission electron microscopy (TEM, FEI, Talos F200S, 200kV) coupled with EDS analysis, and HAADF-STEM (FEI Titan Cubed Themis G2 300, 200 kV). X-ray photoelectron spectrometer (XPS) was employed to analyze the composition and valence states of samples on a Thermo Scientific ESCALAB 250Xi X-ray photoelectron spectrometer with a monochromatic Al K $\alpha$  radiation (225W, 15mA, 15kV). UV-Vis spectra were conducted on a Shimadzu UV-3600 UV-Vis spectrophotometer.  $^1H$  nuclear magnetic resonance (NMR) spectra were collected by a superconducting-magnet NMR spectrometer (Agilent, 600 DD2, 600 MHz).

### Working Electrode Preparation

Primarily, 5 mg catalyst was dispersed in a mixed solution consisting of 50  $\mu$ L Nafion (5 w%)

and 950  $\mu\text{L}$  ethanol, and then a homogeneous ink was obtained by sonicating for 1 h. Subsequently, 80  $\mu\text{L}$  of the ink was loaded onto a carbon paper with area of  $1\text{ cm} \times 1\text{ cm}$  and dried under ambient condition. Thus, the working electrode was obtained.

### Electrochemical NRR Testing

The NRR tests were measured in a two-compartment electrolytic cell separated by a Nafion-1035 proton exchange membrane. Before the NRR tests, this Nafion membrane was pretreated by boiling in  $\text{H}_2\text{O}_2$  (3%) aqueous solution at  $120\text{ }^\circ\text{C}$  for 0.5 h. Then, it was boiled in 0.5 M  $\text{H}_2\text{SO}_4$  solution for 1 h and rinsed in ultrapure water several times. The electrochemical tests were conducted on a typical three-electrode system, where the as-synthesized working electrode and the reference electrode of Ag/AgCl were placed in cathode compartment, while the Pt foil as the counter electrode was placed in anode compartment. In this work, all potentials were converted to reversible hydrogen electrode (RHE) and calibration with the following equation:  $E\text{ (vs RHE)} = E\text{ (vs Ag/AgCl)} + 0.21 + 0.059 \times \text{pH}$  (in 3 M aqueous KCl corresponding to the standard potential of Ag/AgCl,  $E^\circ_{\text{Ag/AgCl}} = 0.21\text{ V}$ ), and the displayed current density was normalized to the geometric surface area. In the process of electrochemical NRR, high-purity  $\text{N}_2$  was first injected into the 0.05 M  $\text{H}_2\text{SO}_4$  solution ( $\text{pH}=1$ ) for at least 30 min to remove the residual air in the cathode compartment. The potentiostatic tests were performed at -0.1 V, -0.2 V, -0.3 V, -0.4 V, -0.5 V and -0.6 V, respectively.

### Determination of ammonia

The concentration of produced  $\text{NH}_3$  was detected via an indophenol blue method. Primarily, 2 mL electrolyte was removed from the cathode compartment and mixed with the 2 mL NaOH solution consisting of 5 wt% salicylic acid and 5 wt% sodium citrate. Then, 1 mL of 0.05 M NaClO and 0.2 mL of 1 wt% sodium nitroferricyanide ( $\text{C}_5\text{FeN}_6\text{Na}_2\text{O}$ ) were successively added into the above solution and stood for 2 h in the dark environment. Subsequently, the absorption spectrum was measured using an UV-Vis spectrophotometer at  $\lambda = 655\text{ nm}$ . Besides, the standard curve was achieved by measuring a series of absorbances for the reference solutions with different  $\text{NH}_4\text{Cl}$  concentrations (0, 0.2  $\mu\text{g mL}^{-1}$ , 0.5  $\mu\text{g mL}^{-1}$ , 1  $\mu\text{g mL}^{-1}$ , 1.5  $\mu\text{g mL}^{-1}$ , 2  $\mu\text{g mL}^{-1}$ , 3  $\mu\text{g mL}^{-1}$ ) in 0.05 M  $\text{H}_2\text{SO}_4$  solution (Figure S5).

### Determination of Hydrazine

The amount of hydrazine in electrolyte was estimated by the method of Watt and Chrisp. Typically, a mixed solution consisting of 5.99 g  $\text{C}_9\text{H}_{11}\text{NO}$ , 30 ml of HCl, and 300 ml of ethanol was synthesized as the color reagent. Then, 5 mL of the electrolyte solution was collected and mixed with 5 mL of the color reagent. After stirring in the dark for 20 min, the absorption spectrum was measured at  $\lambda = 458\text{ nm}$ . Similarly, the standard curve was achieved by measuring a series of absorbances for the reference solutions with different  $\text{N}_2\text{H}_4$  concentrations (0, 0.2  $\mu\text{g mL}^{-1}$ , 0.4  $\mu\text{g mL}^{-1}$ , 0.6  $\mu\text{g mL}^{-1}$ , 0.8  $\mu\text{g mL}^{-1}$ , 1.0  $\mu\text{g mL}^{-1}$ , 2.0  $\mu\text{g mL}^{-1}$ ) in 0.05 M  $\text{H}_2\text{SO}_4$  solution (Figure S6).

### Calculation of the yield rate and the Faradaic efficiency

The  $\text{NH}_3$  yield rate ( $v_{\text{NH}_3}$ ) is obtained using the following equation:

$$v_{\text{NH}_3} = (c_{\text{NH}_3} \times V) / (t \times m_{\text{cat}}) \quad (1)$$

The Faradaic efficiency (FE) is estimated by the ratio of the charge consumed for  $\text{NH}_3$  generation to the quantity of total applied electricity (C), with an assumption that three electrons are consumed to produce one  $\text{NH}_3$  molecule:

$$\text{FE} = (3 \times F \times c_{\text{NH}_3} \times V) / (17 \times Q) \quad (2)$$

where  $c_{\text{NH}_3}$  is the mass concentration of measured  $\text{NH}_3$ ;  $V$  is the electrolyte volume;  $t$  is the reduction time (1h);  $m_{\text{cat}}$  is the loading mass of catalyst;  $F$  is the faraday constant ( $96\,485\text{ C mol}^{-1}$ );  $Q$  is the

quantity of total applied electricity (C).

The normalized  $v_{\text{NH}_3}$  can be calculated by the equation:

$$\text{Normalized } v_{\text{NH}_3} = (c_{\text{NH}_3} \times V) / (t \times A \times \text{RF}) \quad (3)$$

where RF is the roughness factor.

### Computational Methods

All the calculations were conducted by the spin-polarized density functional theory (DFT) with the projector-augmented-wave pseudopotential (PAW)<sup>1</sup> implemented in Vienna ab initio Simulation Package (VASP).<sup>2-5</sup> The Perdew-Burke-Ernzerhof (PBE) functional was performed to describe the exchange-correlation energy.<sup>6</sup> Considering the strong correlation among the electrons of transition metal oxides, the GGA + U approach was adopted.<sup>7</sup> The effective U value for V was set to 2.5.<sup>8</sup> A cutoff energy of 500 eV for the plane-wave basis was adopted. The energy convergence criteria was set to  $10^{-5}$  eV. The force convergence in self-consistent field was 0.03 eV/Å for the geometry optimization. A vacuum space of 10 Å along the z-direction was used to prevent interactions between periodic images. The Brillouin zone was sampled using a  $2 \times 2 \times 1$  grid centered at the gamma (Γ) point for fully relaxed geometry optimization, while a  $4 \times 4 \times 1$  k-points grid was employed for electronic property computations.

The Gibbs free energy (G) of each NRR intermediates was calculated based on the computational hydrogen electrode (CHE) model proposed by Nørskov et al<sup>9</sup>. The chemical potential of proton/electron ( $\text{H}^+/\text{e}^-$ ) pair in aqueous solution is equal to half of the  $\text{H}_2$  gas molecule at standard hydrogen electrode (SHE) conditions. According to CHE model, the G can be defined as follows:

$$G = \Delta E - T\Delta S + \Delta E_{\text{ZPE}} + \Delta G_{\text{U}} + \Delta G_{\text{pH}} \quad (4)$$

Where  $\Delta E$  is the total energy directly obtained by DFT calculations, and T is the temperature (T=298.15 K).  $\Delta E_{\text{ZPE}}$  and  $\Delta S$  are the differences of zero-point energy and entropy, respectively.  $\Delta G_{\text{U}}$  is the free energy contribution related to applied potential U, which can be determined as  $\Delta G_{\text{U}} = -eU$ . The U value is determined by the equation  $U = -\Delta G_{\text{max}}/e$ , where  $\Delta G_{\text{max}}$  is free energy change in potential-determining step.  $\Delta G_{\text{pH}}$  is the correction of the free energy of  $\text{H}^+$  ions by the concentration dependence of the entropy:  $\Delta G_{\text{pH}} = 2.303 \times k\text{B} \times \text{pH}$ , where kB is the Boltzmann constant, and the value of pH is set to be 0 at acid conditions.

where  $\Delta E$  is the reaction energy difference,  $\Delta E_{\text{ZPE}}$  and  $\Delta S$  are the difference in the zero-point energy and entropy obtained. In addition, the adsorption energy ( $E_{\text{ad}}$ ) of adsorbate is defined as:

$$E_{\text{ad}} = E_{\text{M}^*} - E^* - E_{\text{M}} \quad (5)$$

where  $E_{\text{M}^*}$ ,  $E^*$ , and  $E_{\text{M}}$ , are total energies of catalyst with adsorbates, the isolate catalyst, and the corresponding adsorbates, respectively.

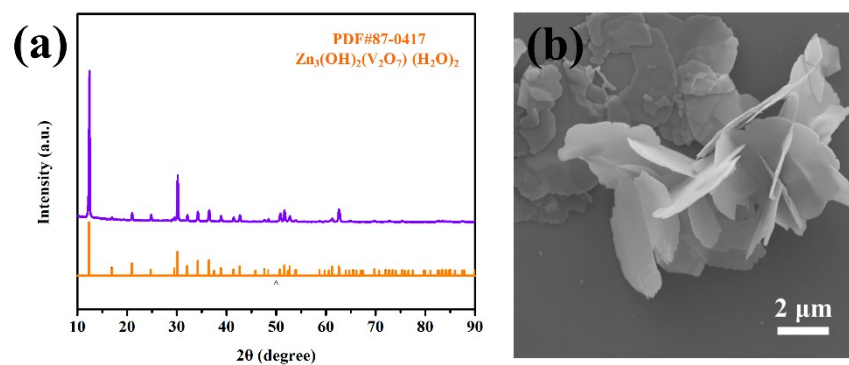

**Figure S1.** (a) XRD pattern and (b) SEM image of the precursor for  $\text{Zn}_3(\text{OH})_2(\text{V}_2\text{O}_7)(\text{H}_2\text{O})_2$  nanosheets.

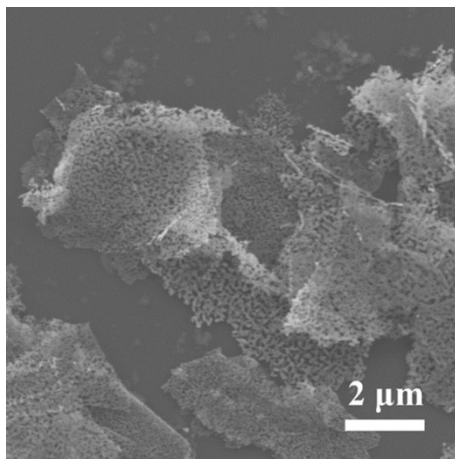

**Figure S2.** SEM image of the core  $\text{V}_2\text{O}_3$  nanomeshes

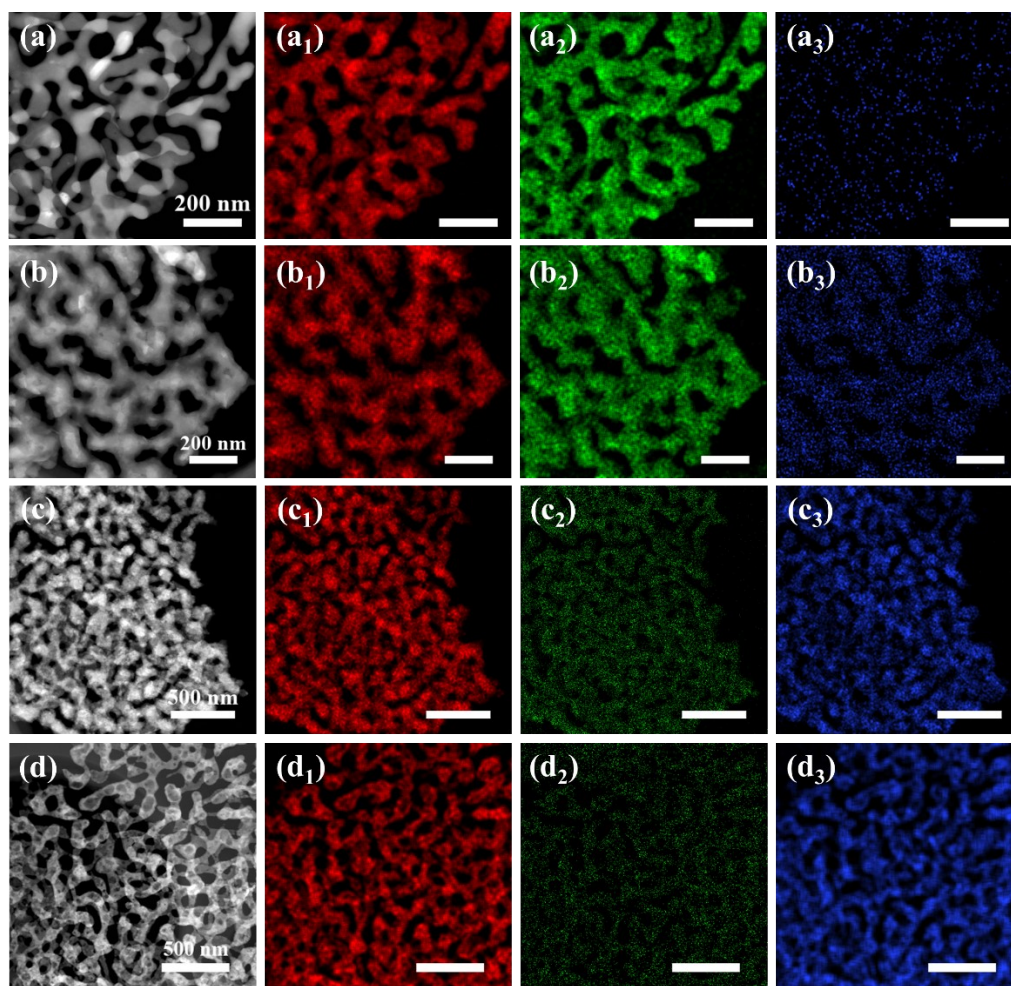

**Figure S3.** HAADF-STEM images of (a) 2D porous  $\text{V}_2\text{O}_3/\text{VN}-0.5$ , (b) 2D porous  $\text{V}_2\text{O}_3/\text{VN}-2$ , (c) 2D porous  $\text{V}_2\text{O}_3/\text{VN}-10$ , (d) 2D porous pure VN. The corresponding EDS elemental mapping images of (a<sub>1</sub>-d<sub>1</sub>) V, (a<sub>2</sub>-d<sub>2</sub>) O, and (a<sub>3</sub>-d<sub>3</sub>) N based on image **a**, **b**, **c**, **d**, respectively.

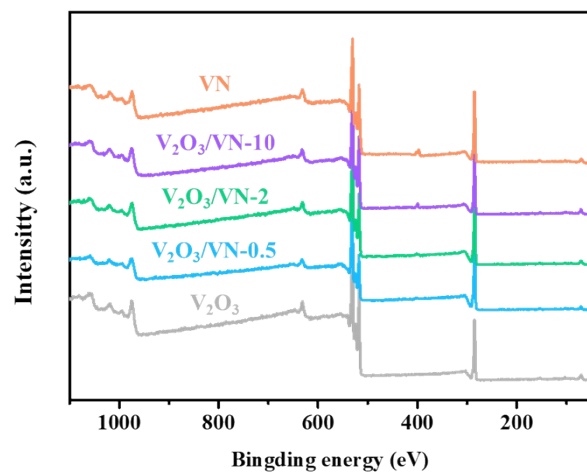

**Figure S4.** XPS full spectra of pure V<sub>2</sub>O<sub>3</sub>, V<sub>2</sub>O<sub>3</sub>/VN-0.5, V<sub>2</sub>O<sub>3</sub>/VN-2, V<sub>2</sub>O<sub>3</sub>/VN-10, and pure VN.

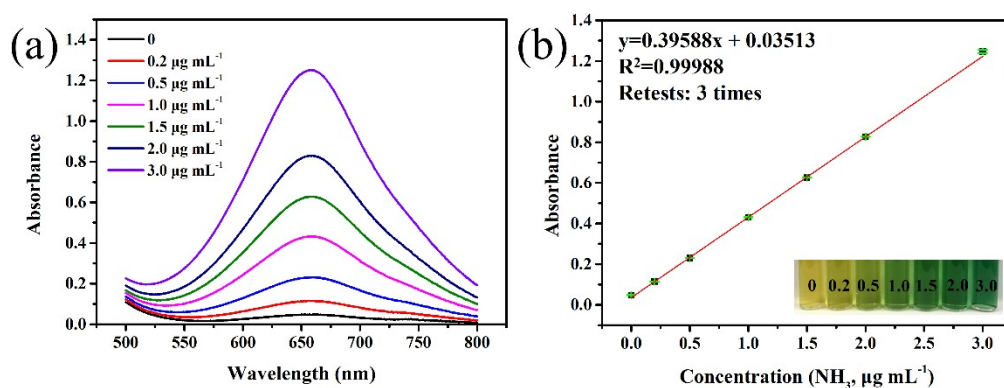

**Figure S5.** (a) UV-vis curves of indophenol assays with  $\text{NH}_4^+$  ions (ammonium chloride solutions of known concentration) after being incubated for 2 h at room temperature. (b) calibration curve used for estimation of  $\text{NH}_3$  by  $\text{NH}_4^+$  ion concentration. The absorbance at 655 nm was measured by UV-vis spectrophotometer. The standard curve showed good linear relation of absorbance with  $\text{NH}_4^+$  ion concentration ( $y = 0.39588x + 0.03513$ ,  $R^2 = 0.99988$ ) of three times independent calibration curves. The inset in **b** shows the chromogenic reaction of indophenol indicator with  $\text{NH}_4^+$  ions.

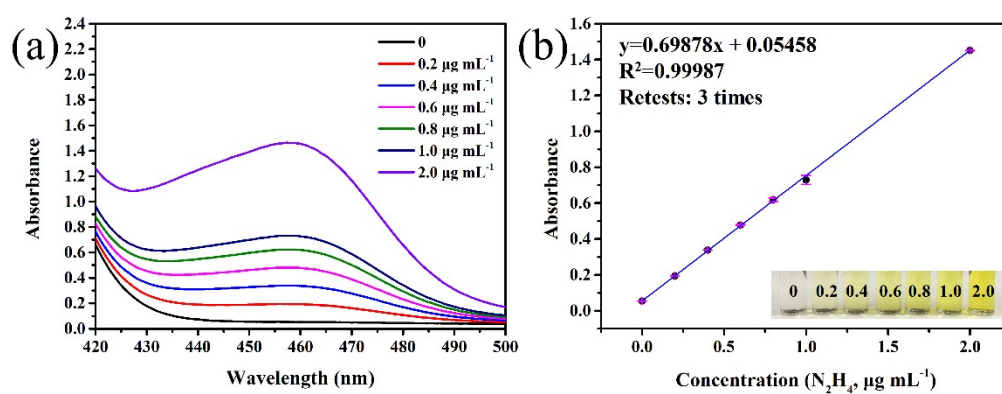

**Figure S6.** (a) UV-Vis absorption spectra of various  $\text{N}_2\text{H}_4$  concentration after incubated for 20 min at room temperature. (b) Calibration curve used for calculation of  $\text{N}_2\text{H}_4$  concentration. The absorbance at 458 nm was measured by UV-vis spectrophotometer. The inset in **b** shows the chromogenic reaction of para-dimethylamino-benzaldehyde indicator with  $\text{N}_2\text{H}_4$ .

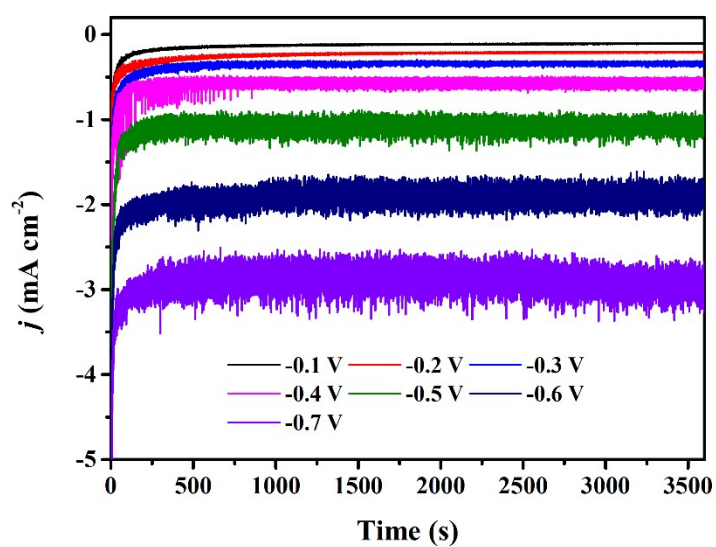

**Figure S7.** Chronoamperometry curves of 2D Core/Shell  $\text{V}_2\text{O}_3/\text{VN}$  nanomeshes at different applied potentials in  $\text{N}_2$ -saturated 0.05 M  $\text{H}_2\text{SO}_4$  solution.

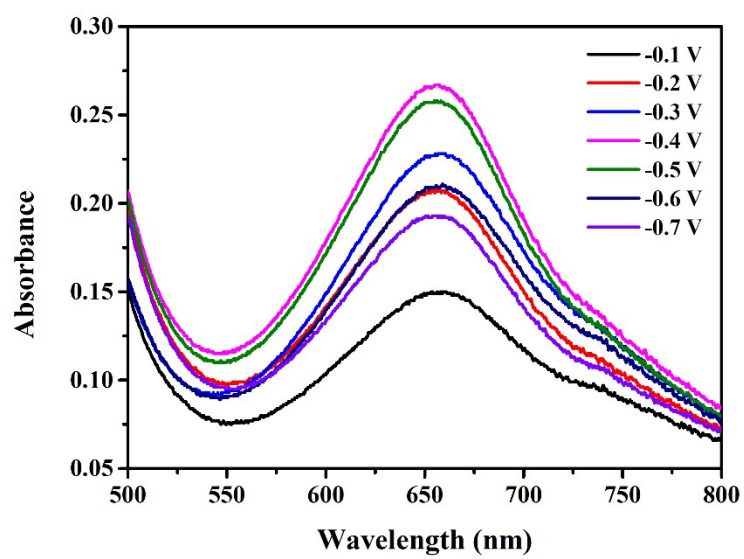

**Figure S8.** UV-Vis absorption spectra of the electrolytes colored with indophenol indicator after 1 h electrolysis in N<sub>2</sub> at various potentials under ambient conditions.

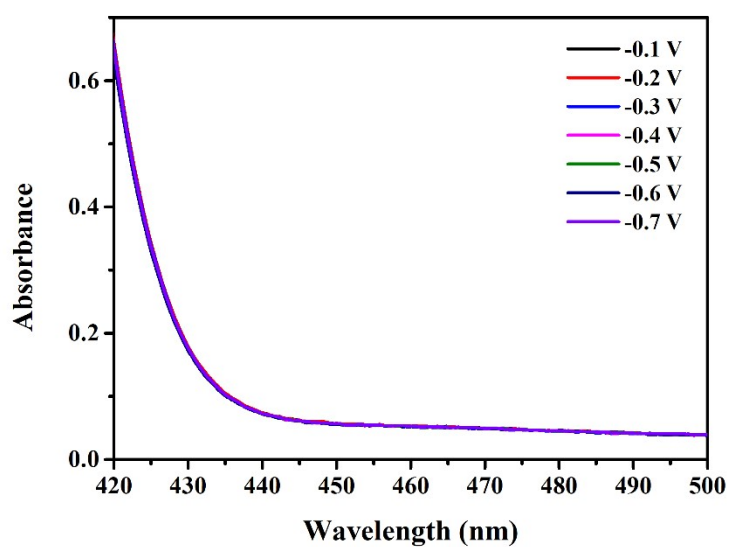

**Figure S9.** UV-Vis absorption spectra of the electrolytes stained with para-dimethylamino-benzaldehyde indicator after 1 h electrolysis in  $N_2$  at various potentials under ambient conditions.

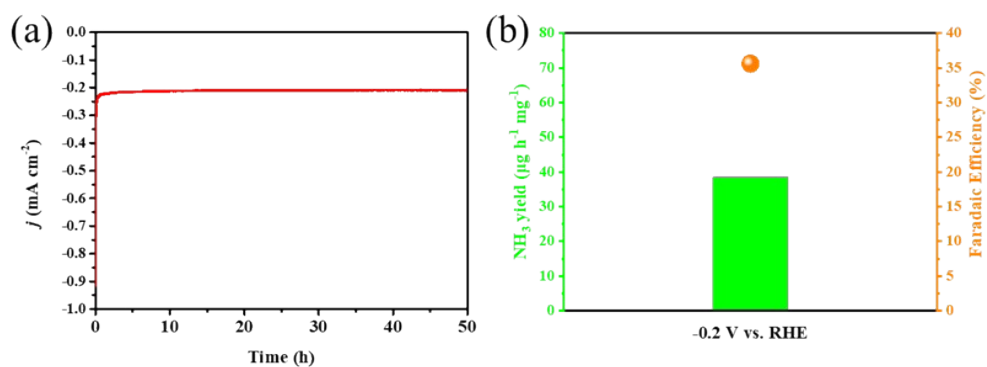

**Figure S10.** (a) Time-dependent current density curve of 2D Core/Shell V<sub>2</sub>O<sub>3</sub>/VN-2 nanomeshes in N<sub>2</sub>-saturated 0.05 M H<sub>2</sub>SO<sub>4</sub> solution at -0.2 V vs. RHE. (b) The NH<sub>3</sub> yield and FE at -0.2 V vs. RHE after long-term electrocatalytic test of 50 h.

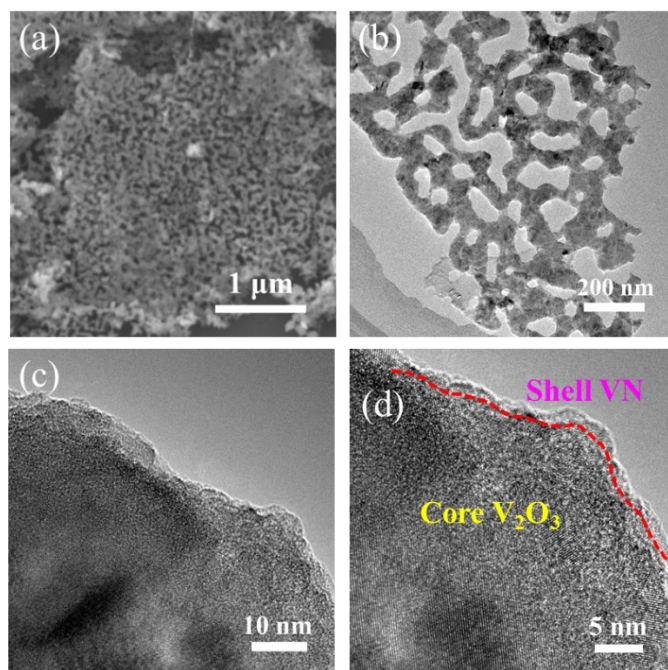

**Figure S11.** (a) SEM image, (b) TEM image, (c) and (d) High-resolution TEM images for 2D Core/Shell  $\text{V}_2\text{O}_3/\text{VN}$ -2 nanomeshes after the electrocatalysis.

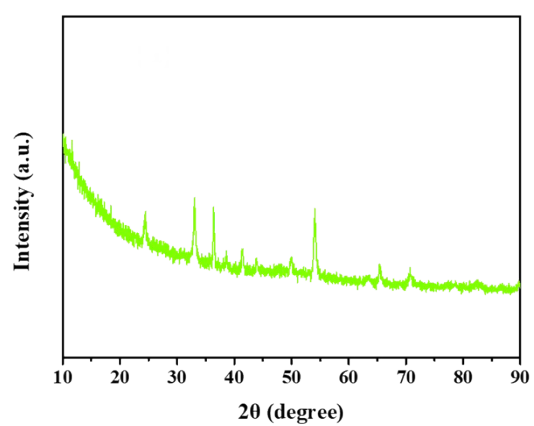

**Figure S12.** XRD pattern of 2D Core/Shell  $\text{V}_2\text{O}_3/\text{VN-2}$  nanomeshes after electrocatalysis.

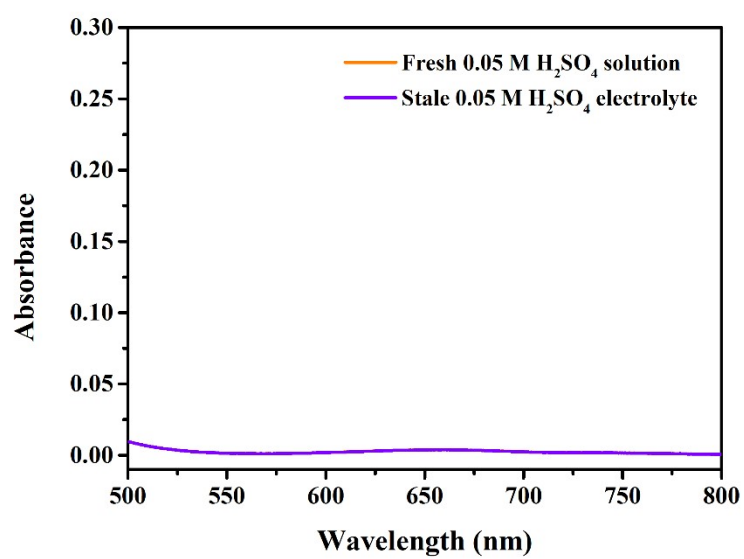

**Figure S13.** UV-Vis absorption spectra of blank experiments with the fresh 0.05 M H<sub>2</sub>SO<sub>4</sub> solution and the stale 0.05 M H<sub>2</sub>SO<sub>4</sub> electrolyte treated by N<sub>2</sub> gas bubbling for 1h, which are colored with indophenol indicator.

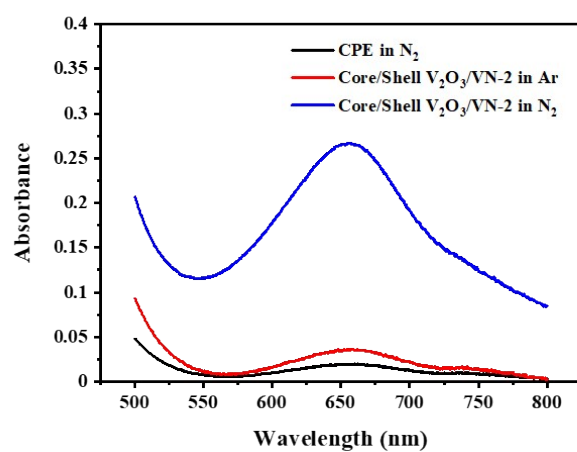

**Figure S14.** UV-vis absorption spectra of the electrolytes stained with indophenol indicator after charging at -0.4 V vs. RHE for 1 h under various conditions

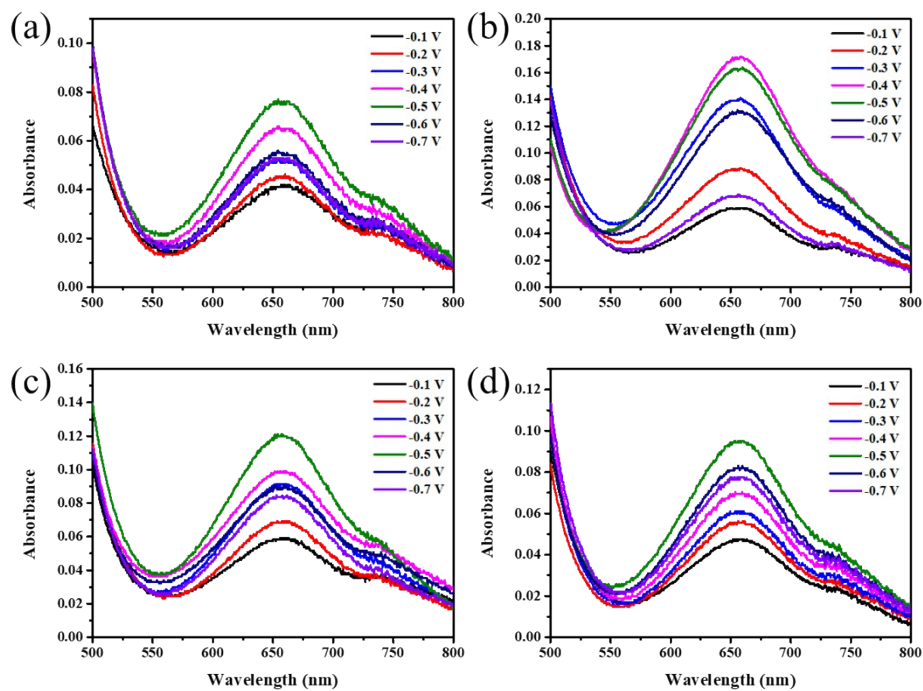

**Figure S15.** UV-Vis absorption spectra of the electrolytes stained with indophenol indicator at different applied potentials over (a) pure  $\text{V}_2\text{O}_3$  nanomeshes, (b) core/shell  $\text{V}_2\text{O}_3/\text{VN}-0.5$  nanomeshes, (c) core/shell  $\text{V}_2\text{O}_3/\text{VN}-10$  nanomeshes, and (d) pure VN nanomeshes

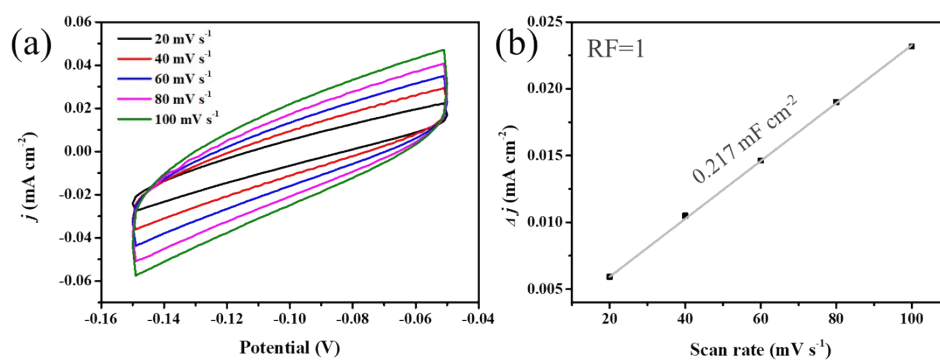

**Figure S16.** (a) Cyclic voltammetry curves of pure  $V_2O_3$  nanomeshes at various rates (20, 40, 60, 80, and 100  $mV s^{-1}$ ), respectively. (b) The corresponding plots of the current density variation at -0.1 V vs. the scan rate. Here, we suppose that roughness factor (RF) value of pure  $V_2O_3$  nanomeshes sample is 1.

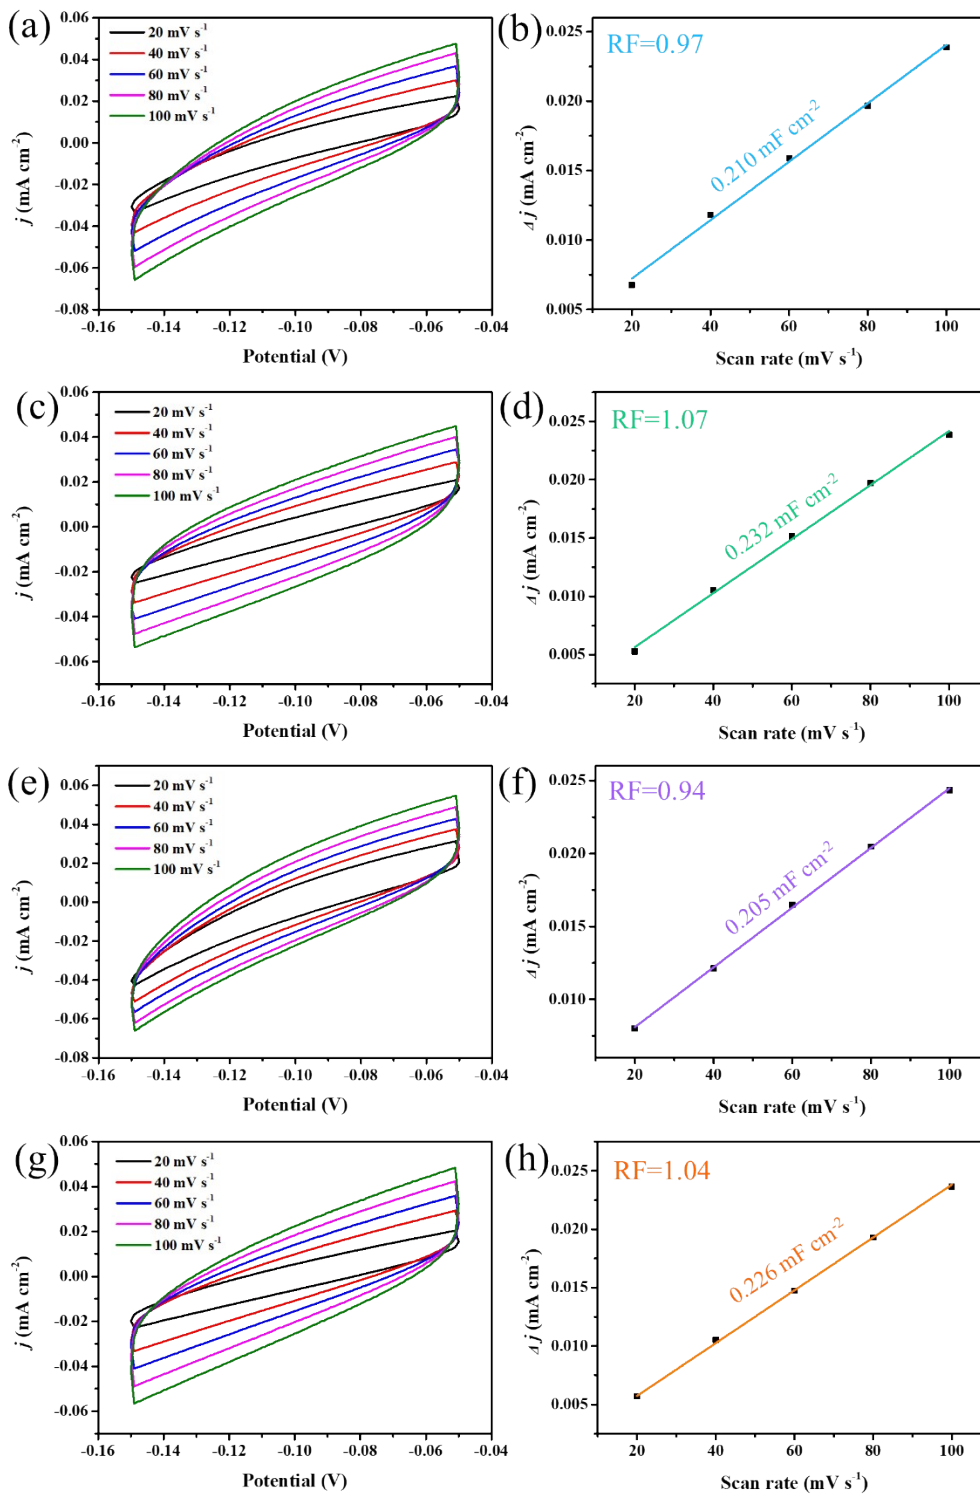

**Figure S17.** Cyclic voltammetry curves of core/shell V<sub>2</sub>O<sub>3</sub>/VN-0.5 nanomeshes (a), core/shell V<sub>2</sub>O<sub>3</sub>/VN-2 nanomeshes (c) core/shell V<sub>2</sub>O<sub>3</sub>/VN-10 nanomeshes (e) and pure VN nanomeshes (g). at various rates (20, 40, 60, 80, and 100 mV s<sup>-1</sup>), respectively. (b), (d), (f), and (h) The corresponding plots of the current density variation at -0.1 V vs. the scan rate. RFs in insets were calculated by dividing the capacitances of core/shell V<sub>2</sub>O<sub>3</sub>/VN-X and pure VN nanomeshes by the  $C_{dl}$  value of pure V<sub>2</sub>O<sub>3</sub> nanomeshes with an assumption that its RF value is 1.

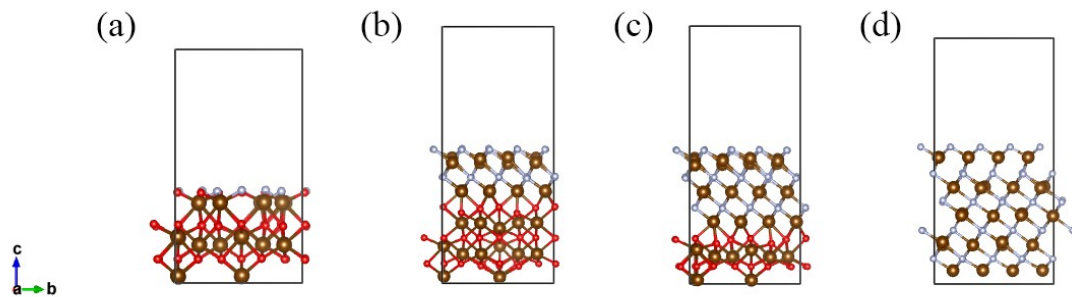

**Figure S18.** Structural prototype of these four systems. (a)  $\text{V}_2\text{O}_3/\text{N-doped}$ , (b)  $\text{V}_2\text{O}_3/\text{VN-2 layer}$ , (c)  $\text{V}_2\text{O}_3/\text{VN-3 layer}$ , (d) pure VN. The brown, red, and gray balls represent the V, O, and N atoms, respectively.

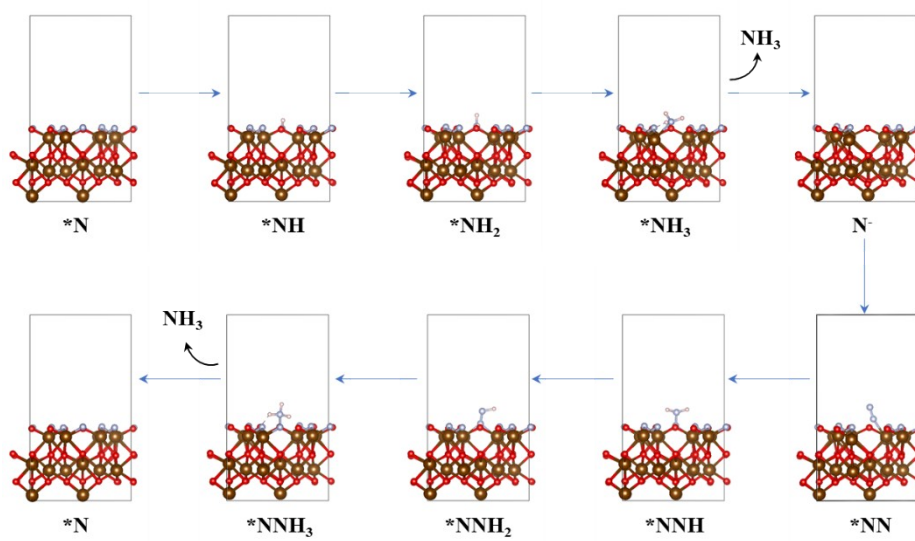

**Figure S19.** Atomistic structure schemes showing the MvK pathway of the  $\text{N}_2$  reduction over  $\text{V}_2\text{O}_3/\text{N}$ -doped.

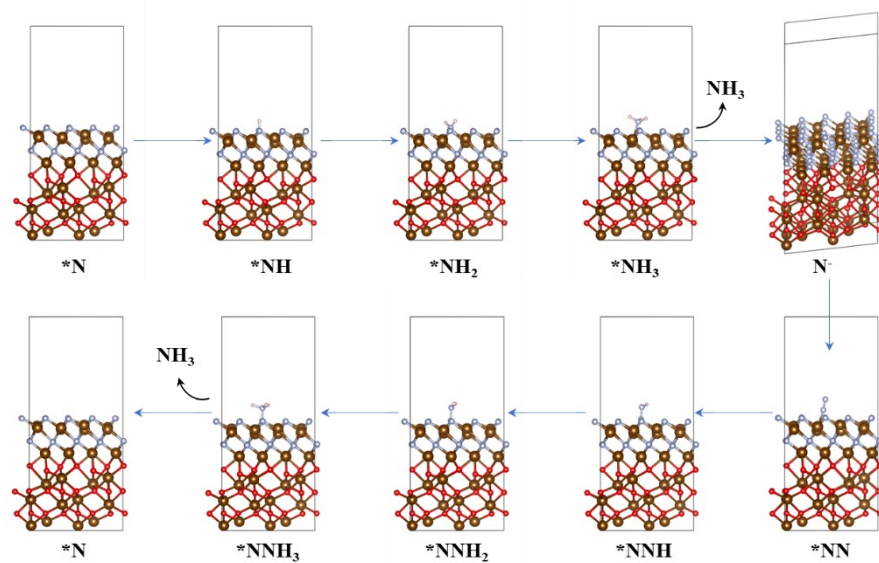

**Figure S20.** Atomistic structure schemes showing the MvK pathway of the  $\text{N}_2$  reduction over  $\text{V}_2\text{O}_3/\text{VN}$ -2 layer.

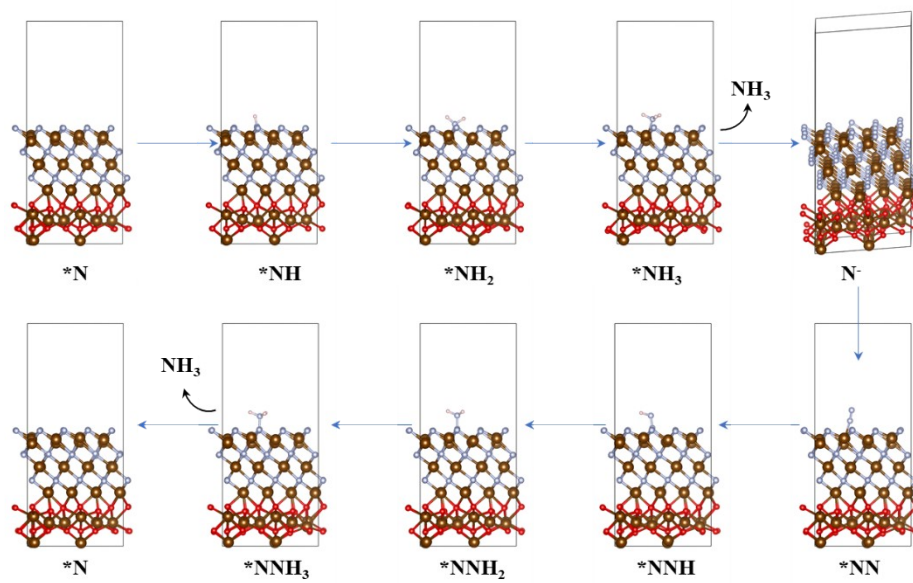

**Figure S21.** Atomistic structure schemes showing the MvK pathway of the  $\text{N}_2$  reduction over  $\text{V}_2\text{O}_3/\text{VN}$ -3 layer.

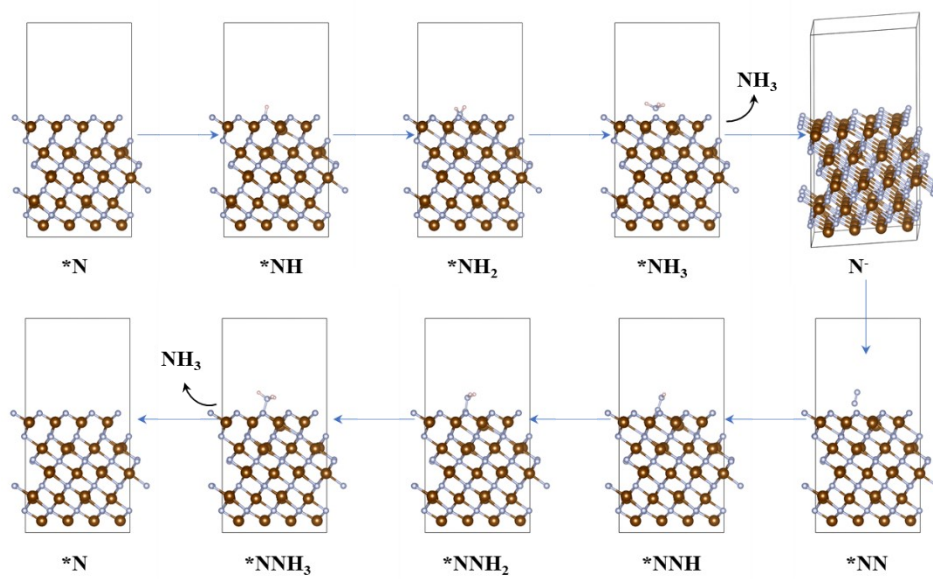

**Figure S22.** Atomistic structure schemes showing the MvK pathway of the  $\text{N}_2$  reduction over pure VN.

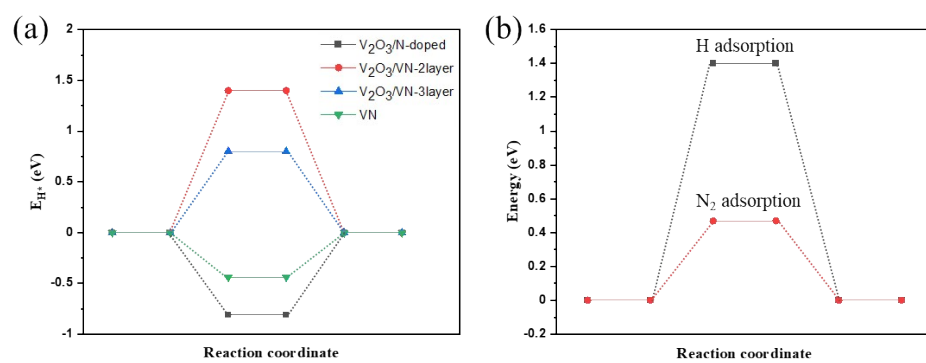

**Figure S23.** (a) H adsorption energy comparisons for  $\text{V}_2\text{O}_3/\text{N-doped}$ ,  $\text{V}_2\text{O}_3/\text{VN-2 layer}$ ,  $\text{V}_2\text{O}_3/\text{VN-3 layer}$ , and pure VN. (b) Adsorption energy comparisons of  $\text{N}_2$  and H over  $\text{V}_2\text{O}_3/\text{VN-2}$  layer.

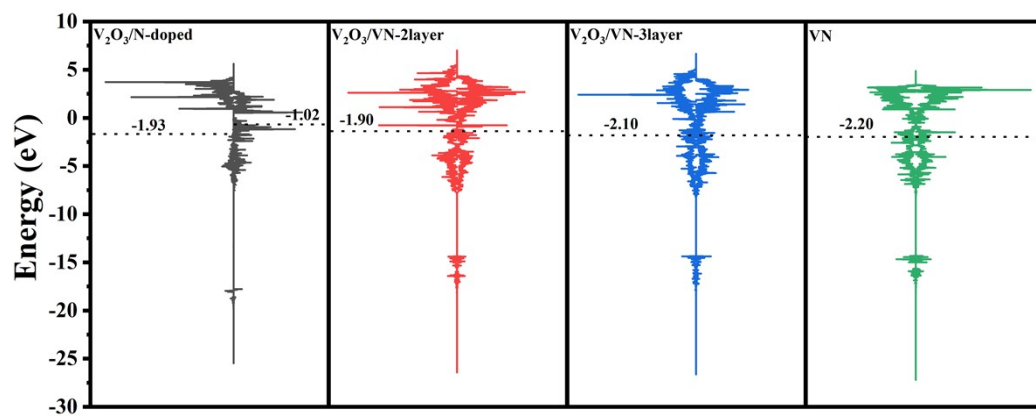

**Figure S24.** The d-band state of these four systems. The dash line highlight the d-band center.

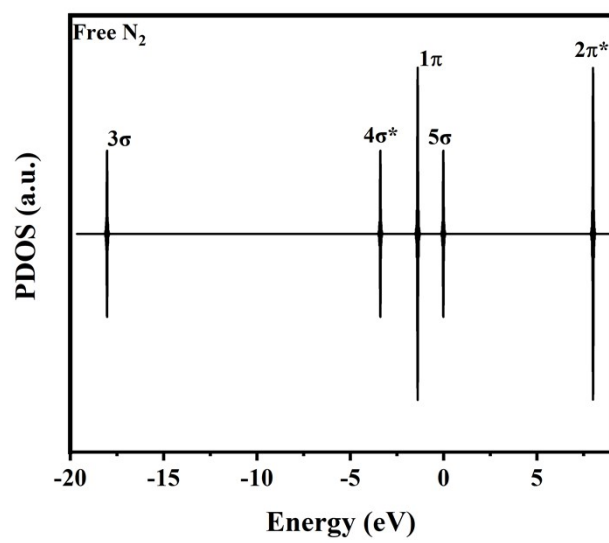

**Figure S25.** The molecular orbitals of free N<sub>2</sub>.

**Table S1.** Comparison of electrochemical N<sub>2</sub> reduction performance for 2D core/shell V<sub>2</sub>O<sub>3</sub>/VN nanomeshs with recently reported advanced electrocatalysts in acid electrolyte under ambient conditions.

| Catalyst                                                                            | Electrolyte                               | Temperature             | NH <sub>3</sub> Yield Rate                                   | FE           | Reference        |
|-------------------------------------------------------------------------------------|-------------------------------------------|-------------------------|--------------------------------------------------------------|--------------|------------------|
| <b>2D core/shell V<sub>2</sub>O<sub>3</sub>/VN nanomeshs</b>                        | <b>0.05 M H<sub>2</sub>SO<sub>4</sub></b> | <b>Room temperature</b> | <b>59.7 μg h<sup>-1</sup> mg<sup>-1</sup><sub>cat.</sub></b> | <b>34.9%</b> | <b>This work</b> |
| SA-Mo/NPC                                                                           | 0.1 M HCl                                 | Room temperature        | 31.5 μg h <sup>-1</sup> mg <sup>-1</sup> <sub>cat.</sub>     | 6.7%         | 10               |
| B <sub>4</sub> C                                                                    | 0.1 M HCl                                 | Room temperature        | 26.57 μg h <sup>-1</sup> mg <sup>-1</sup> <sub>cat.</sub>    | 15.95%       | 11               |
| Boron-doped graphene                                                                | 0.05 M H <sub>2</sub> SO <sub>4</sub>     | 25 °C                   | 9.8 μg h <sup>-1</sup> cm <sup>-2</sup>                      | 10.8%        | 12               |
| N-doped porous carbon                                                               | 0.05 M H <sub>2</sub> SO <sub>4</sub>     | Room temperature        | 1.40 mmol g <sup>-1</sup> h <sup>-1</sup>                    | 1.42%        | 13               |
| OVs-MoO <sub>2</sub>                                                                | 0.1 M HCl                                 | Room temperature        | 12.20 μg h <sup>-1</sup> mg <sup>-1</sup> <sub>cat.</sub>    | 10.04%       | 14               |
| Oxygen-Vacancy-Rich TiO <sub>2</sub> /Ti <sub>3</sub> C <sub>2</sub> T <sub>x</sub> | 0.1 M HCl                                 | Room temperature        | 32.17 μg h <sup>-1</sup> mg <sup>-1</sup> <sub>cat.</sub>    | 16.07%       | 15               |
| Amorphous Bi <sub>4</sub> V <sub>2</sub> O <sub>11</sub> /CeO <sub>2</sub>          | 0.1 M HCl                                 | Room temperature        | 23.21 μg h <sup>-1</sup> mg <sup>-1</sup> <sub>cat.</sub>    | 10.16%       | 16               |
| PCN-NV4                                                                             | 0.1 M HCl                                 | Room temperature        | 8.09 μg h <sup>-1</sup> mg <sup>-1</sup> <sub>cat.</sub>     | 11.59%       | 17               |
| Bi nanodendrites                                                                    | 0.1 M HCl                                 | Room temperature        | 25.86 μg h <sup>-1</sup> mg <sup>-1</sup> <sub>cat.</sub>    | 10.8%        | 18               |
| BiNi alloy                                                                          | 0.1 M Na <sub>2</sub> SO <sub>4</sub>     | Room temperature        | 17.5 μg h <sup>-1</sup> mg <sup>-1</sup> <sub>cat.</sub>     | 13.8%        | 19               |

|                                         |                                       |                     |                                                             |       |           |
|-----------------------------------------|---------------------------------------|---------------------|-------------------------------------------------------------|-------|-----------|
| 2D c-COFs with Fe–<br>N <sub>4</sub> –C | 0.01 M H <sub>2</sub> SO <sub>4</sub> | Room<br>temperature | 33.6 µg h <sup>−1</sup><br>mg <sup>−1</sup> <sub>cat.</sub> | 31.9% | <b>20</b> |
| CoS <sub>2</sub> /NS-G                  | 0.05 M H <sub>2</sub> SO <sub>4</sub> | Room<br>temperature | 25.0 µg h <sup>−1</sup><br>mg <sup>−1</sup> <sub>cat.</sub> | 25.9% | <b>21</b> |

## References

1. P. E. Blochl, *Phys. Rev. B*, 1994, **50**, 17953–17979.
2. G. Kresse and J. Furthmuller, *Comp. Mater. Sci.*, 1996, **6**, 15–50.
3. G. Kresse and J. Furthmuller, *Phys. Rev. B*, 1996, **54**, 11169–11186.
4. G. Kresse and D. Joubert, *Phys. Rev. B*, 1999, **59**, 1758–1775.
5. S. Grimme, J. Antony, S. Ehrlich and H. Krieg, *J. Chem. Phys.*, 2010, **132**, 154104.
6. J. P. Perdew, K. Burke and M. Ernzerhof, *Phys. Rev. Lett.*, 1996, **77**, 3865–3868.
7. F. A. a. A. I. L. Vladimir I Anisimov†, *J. Phys-Condens. Mat.*, 1997, **9**, 767–808.
8. J. Zhang, R.-J. Zhou, Q.-Y. Chang, Z.-J. Sui, X.-G. Zhou, D. Chen and Y.-A. Zhu, *Catal Today*, 2021, **368**, 46–57.
9. J. K. Nørskov, J. Rossmeisl, A. Logadottir, L. Lindqvist, J. R. Kitchin, T. Bligaard and H. Jonsson, *J. Phys. Chem. B*, 2004, **108**, 17886–17892.
10. L. Han, X. Liu, J. Chen, R. Lin, H. Liu, F. Lue, S. Bak, Z. Liang, S. Zhao, E. Stavitski, J. Luo, R. R. Adzic and H. L. Xin, *Angew. Chem. Int. Ed.*, 2019, **58**, 2321–2325.
11. W. Qiu, X. Y. Xie, J. Qiu, W. H. Fang, R. Liang, X. Ren, X. Ji, G. Cui, A. M. Asiri, G. Cui, B. Tang and X. Sun, *Nat. Commun.*, 2018, **9**, 3485.
12. X. Yu, P. Han, Z. Wei, L. Huang, Z. Gu, S. Peng, J. Ma and G. Zheng, *Joule*, 2018, **2**, 1610–1622.
13. Y. Liu, Y. Su, X. Quan, X. Fan, S. Chen, H. Yu, H. Zhao, Y. Zhang and J. Zhao, *ACS Catal.*, 2018, **8**, 1186–1191.
14. W. Cheng, X. Zhao, H. Su, F. Tang, W. Che, H. Zhang and Q. Liu, *Nat. Energy*, 2019, **4**, 115–122.
15. Y. Fang, Z. Liu, J. Han, Z. Jin, Y. Han, F. Wang, Y. Niu, Y. Wu and Y. Xu, *Adv. Energy Mater.*, 2019, **9**, 1803406.
16. C. Lv, C. Yan, G. Chen, Y. Ding, J. Sun, Y. Zhou and G. Yu, *Angew. Chem. Int. Ed.*, 2018, **57**, 6073–6076.
17. C. Lv, Y. Qian, C. Yan, Y. Ding, Y. Liu, G. Chen and G. Yu, *Angew. Chem. Int. Ed.*, 2018, **57**, 10246–10250.
18. F. Wang, X. Lv, X. Zhu, J. Du, S. Lu, A. A. Alshehri, K. A. Alzahrani, B. Zheng and X. Sun, *Chem. Commun.*, 2020, **56**, 2107–2110.
19. Z. Fang, P. Wu, Y. Qian and G. Yu, *Angew. Chem. Int. Ed.*, 2021, **60**, 4275–4281.
20. H. Zhong, M. Wang, M. Ghorbani-Asl, J. Zhang, K. H. Ly, Z. Liao, G. Chen, Y. Wei, B. P. Biswal, E. Zschech, I. M. Weidinger, A. V. Krashenninnikov, R. Dong and X. Feng, *J. Am. Chem. Soc.*, 2021, **143**, 19992–20000.
21. P. Chen, N. Zhang, S. Wang, T. Zhou, Y. Tong, C. Ao, W. Yan, L. Zhang, W. Chu, C. Wu and Y. Xie, *Proc. Natl Acad. Sci.*, 2019, **116**, 6635–6640.
